# Supplementary material
Source: Springer Nature journal article supplement (https://www.springermedizin.de/resource/supplementary/13023_2013_642_MOESM5_ESM.pdf/9642578)

SMITH - RAYSON - 10/10/72

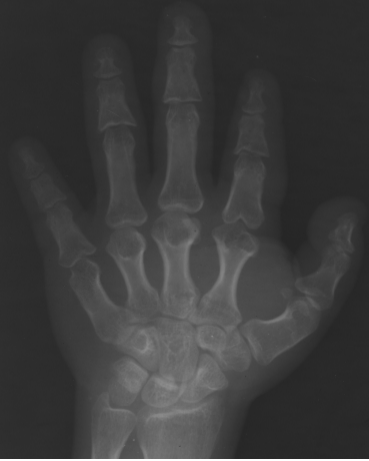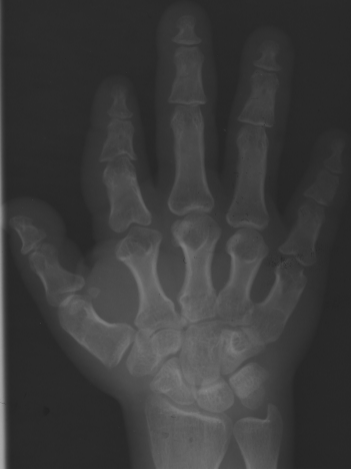

Supplement: MOESM5 [file 9642578]
